# Supplementary material
Source: PubMed Central journal article supplement (PMC6008203)
Supplement: NIHMS952907-supplement-1.pdf [file NIHMS952907-supplement-1.pdf]

**Supplementary Table 1.** Strains used in this study.

| Strain                             | Genotype, Description                                                  | Source (Reference) |
|------------------------------------|------------------------------------------------------------------------|--------------------|
| <i>E. coli</i> DH5 $\alpha$        | <i>E. coli</i> host for general cloning                                | Life Technologies  |
| <i>E. coli</i> BL21(DE3)           | <i>E. coli</i> host for protein production                             | Life Technologies  |
| <i>E. coli</i> BL21(DE3)-Gold      | <i>E. coli</i> host for protein production                             | Stratagene/Agilent |
| <i>E. coli</i> BW25113/pIJ790      | <i>E. coli</i> host for $\lambda$ RED-mediated PCR targeting           | (1)                |
| <i>E. coli</i> DH5 $\alpha$ /BT340 | <i>E. coli</i> host for FLP-mediated excision of disruption cassette   | (2)                |
| <i>E. coli</i> ET12567/pUZ8002     | Methylation-deficient <i>E. coli</i> host for intergeneric conjugation | (3)                |
| <i>S. platensis</i> SB12029        | CB00739 $\Delta$ <i>ptmR1</i> (markerless)                             | (4)                |
| <i>S. platensis</i> SB12037        | SB12029 $\Delta$ <i>ptmA1::aac(3)IV</i>                                | This study         |
| <i>S. platensis</i> SB12038        | SB12029 $\Delta$ <i>ptmA2::aac(3)IV</i>                                | This study         |

**Supplementary Table 2.** Plasmids and cosmids used in this study.

| Plasmid  | Description                                                                                                                                                                 | Source (Reference) |
|----------|-----------------------------------------------------------------------------------------------------------------------------------------------------------------------------|--------------------|
| pBS12064 | Cosmid 17E7 containing a partial <i>ptm</i> gene cluster                                                                                                                    | This study         |
| pBS12065 | pBS12064 $\Delta$ <i>ptmA1::aac(3)IV</i>                                                                                                                                    | This study         |
| pBS12066 | pBS12064 $\Delta$ <i>ptmA2::aac(3)IV</i>                                                                                                                                    | This study         |
| pBS3080  | pRSFDuet-1 derived plasmid containing a <i>BsmFI</i> site for ligation-independent cloning (LIC) and encodes a TEV protease site after the N-terminal His <sub>6</sub> -tag | (5)                |
| pBS12067 | pBS3080 harboring the full length <i>ptmA2</i> ; used for enzyme assays                                                                                                     | This study         |
| pBS12068 | pBS12067-derived <i>ptmA2</i> H215A mutant                                                                                                                                  | This study         |
| pBS12069 | pBS12067-derived <i>ptmA2</i> E416A mutant                                                                                                                                  | This study         |
| pBS12070 | pBS12067-derived <i>ptmA2</i> A497K mutant                                                                                                                                  | This study         |
| pBS12071 | pBS12067-derived <i>ptmA2</i> T171SGTSGRPK mutant                                                                                                                           | This study         |
| pBS12072 | pBS12067-derived <i>ptmA2</i> A497K/T171SGTSGRPK mutant                                                                                                                     | This study         |
| pBS12073 | pBS12067-derived <i>ptmA2</i> T406R/T408K mutant                                                                                                                            | This study         |
| pMCSG68  | LIC plasmid that encodes a TEV protease site after the N-terminal His <sub>6</sub> - and StrepII-tags, and the tRNA genes, <i>argU</i> and <i>ileX</i> , for rare codons    | (6)                |
| pBS12074 | pMCSG68 harboring full length <i>ptmA2</i> ; used for crystallography                                                                                                       | This study         |

**Supplementary Table 3.** Primers used in this study.

| Primer                       | Nucleotide Sequence (5'-3')                                     | Function                                    |
|------------------------------|-----------------------------------------------------------------|---------------------------------------------|
| 739A1KO_F                    | GGTACCTGAAGGTAAGGGAGAGCCATGC<br>CCGACAGAGAGATTCCGGGGATCCGTCGACC | PCR targeting for <i>ptmA1</i> inactivation |
| 739A1KO_R                    | CCAGGGATTCCGTTTCGTACCATCATGACC<br>TCACCACTCGTGTAGGCTGGAGCTGCTTC | PCR targeting for <i>ptmA1</i> inactivation |
| 739A1ID_F                    | CCTGAAGGTAAGGGAGAGCC                                            | PCR confirmation                            |
| 739A1ID_R                    | TGACCTCACCACTCGTGTCA                                            | PCR confirmation                            |
| 739A1south_F                 | CACGCGTAGTCGTCGAAGTA                                            | Southern probe                              |
| 739A1south_R                 | CCTTCAGGTACCTAACCCGC                                            | Southern probe                              |
| 739A2KO_F                    | GTCCCCGACCGCCTAGGAGCCACCTTGCA<br>GCACACGACCATTCCGGGGATCCGTCGACC | PCR targeting for <i>ptmA2</i> inactivation |
| 739A2KO_R                    | ATCACGGGCTGCCGGTCACTCATCTCAGC<br>GCCCGGGCCTGTAGGCTGGAGCTGCTTC   | PCR targeting for <i>ptmA2</i> inactivation |
| 739A2ID_F                    | ACTTCACCGACCTGTTACC                                             | PCR confirmation                            |
| 739A2ID_R                    | CTGCCGGTCACTCATCTCAG                                            | PCR confirmation                            |
| 739A2south_F                 | GGTGGTGCCGAACATCATA                                             | Southern probe                              |
| 739A2south_R                 | CATTCACGCGACCGAACAG                                             | Southern probe                              |
| 739A2_F                      | AAAACCTCTATTTCCAGTCGTTGCAGCAC<br>ACGACCATC                      | <i>ptmA2</i> amplification for pBS3080      |
| 739A2_R                      | TACTTACTTAAATGTTATCAGCGCCCGGG<br>GCCGAG                         | <i>ptmA2</i> amplification for pBS3080      |
| H215A_F                      | GGCCCCATGTTCGCCATCGGCAACCAC                                     | Mutagenesis                                 |
| H215A_R                      | GTGGTTGCCGATGGCGAACATGGGGCC                                     | Mutagenesis                                 |
| E416A_F                      | AAGTCGGCGGCGGCGAACATCTTCCCG                                     | Mutagenesis                                 |
| E416A_R                      | CGGGAAGATGTTTCGCCGCCGCGGACTT                                    | Mutagenesis                                 |
| A497K_F                      | ACCGTGTCGGGCAAACGGGACTACGAC                                     | Mutagenesis                                 |
| A497K_R                      | GTCGTAGTCCCGTTTGCCCGACACGGT                                     | Mutagenesis                                 |
| T171SGTSGRPK_F<br>(P-loop_F) | CCCGTCCTGTCTGTACACCAGCGGCACC<br>AGCGGGCGGCCGAAA                 | Mutagenesis                                 |
| T171SGTSGRPK_R<br>(P-loop_R) | TTTCGGCCGCCCCGCTGGTGCCGCTGGTGT<br>ACAGGACAGGACGGG               | Mutagenesis                                 |
| T406R/T408K_F                | ACCTTCCTCGGCCGTACGAAACGGATGCT<br>CAAG                           | Mutagenesis                                 |
| T406R/T408K_R                | CTTGAGCATCCGTTTTCGTACGGCCGAGGA<br>AGGT                          | Mutagenesis                                 |
| 739xtalA2_F                  | TACTTCCAATCCAATGCCTTGCAGCACAC<br>GACCATCGGCGACGTC               | <i>ptmA2</i> amplification for pMCSG68      |
| 739xtalA2_R                  | TTATCCACTTCCAATGTTAGCGCCCGGGG<br>CCGAGCGTC                      | <i>ptmA2</i> amplification for pMCSG68      |

**Supplementary Table 4.** Data collection and refinement statistics<sup>a</sup>

|                                                     | PtmA2, 5E7Q                                   | PtmA2/ <b>12</b> , 5UPQ                                                        | PtmA2/ <b>6</b> , 5UPS                                                        | PtmA2/ <b>11</b> , 5UPT                                                                                             |
|-----------------------------------------------------|-----------------------------------------------|--------------------------------------------------------------------------------|-------------------------------------------------------------------------------|---------------------------------------------------------------------------------------------------------------------|
| <b>Data collection</b>                              |                                               |                                                                                |                                                                               |                                                                                                                     |
| Space group                                         | P2 <sub>1</sub> 2 <sub>1</sub> 2 <sub>1</sub> | P2 <sub>1</sub> 2 <sub>1</sub> 2 <sub>1</sub>                                  | P3 <sub>1</sub> 2 <sub>1</sub>                                                | P4 <sub>3</sub> 2 <sub>1</sub> 2                                                                                    |
| Cell dimensions                                     |                                               |                                                                                |                                                                               |                                                                                                                     |
| <i>a</i> , <i>b</i> , <i>c</i> (Å)                  | 70.87, 146.89,<br>146.93                      | 69.61, 145.74,<br>145.76                                                       | 162.67, 162.67,<br>114.14                                                     | 146.16, 146.16,<br>71.14                                                                                            |
| α, β, γ (°)                                         | 90, 90, 90                                    | 90, 90, 90                                                                     | 90, 90, 120                                                                   | 90, 90, 90                                                                                                          |
| Resolution (Å)                                      | 50.0–2.23<br>(2.27–2.23)                      | 38.5–2.42<br>(2.46–2.42)                                                       | 50.0–2.05<br>(2.09–2.05)                                                      | 50.0–1.92<br>(1.95–1.92)                                                                                            |
| Unique reflections                                  | 75465 (3753)                                  | 57650 (2822)                                                                   | 108962 (5391)                                                                 | 59353 (2866)                                                                                                        |
| <i>R</i> <sub>merge</sub>                           | 9.4 (70.1)                                    | 12.3 (90.9)                                                                    | 11.5 (89.3)                                                                   | 9.7 (84.1)                                                                                                          |
| <i>R</i> <sub>meas</sub>                            | 10.3 (80.6)                                   | 13.3 (98.2)                                                                    | 12.2 (95.1)                                                                   | 10.3 (92.6)                                                                                                         |
| <i>I</i> / σ <i>I</i>                               | 23.0 (1.95)                                   | 18.7 (2.2)                                                                     | 24.6 (2.05)                                                                   | 26.1 (2.2)                                                                                                          |
| Completeness (%)                                    | 100 (99.9)                                    | 99.7 (99.5)                                                                    | 100 (100)                                                                     | 99.5 (98.7)                                                                                                         |
| Redundancy                                          | 6.1 (4.1)                                     | 7.1 (7.0)                                                                      | 8.6 (8.5)                                                                     | 9.0 (5.9)                                                                                                           |
| CC <sub>1/2</sub> (Å)                               | 0.697                                         | 0.617                                                                          | 0.749                                                                         | 0.660                                                                                                               |
| CC*                                                 | 0.906                                         | 0.873                                                                          | 0.926                                                                         | 0.892                                                                                                               |
| <b>Refinement</b>                                   |                                               |                                                                                |                                                                               |                                                                                                                     |
| Resolution (Å)                                      | 48.3–2.23<br>(2.231–2.289)                    | 38.5–2.42<br>(2.474–2.412)                                                     | 48.3–2.05<br>(2.103–2.05)                                                     | 36.2–1.92<br>(1.965–1.916)                                                                                          |
| No. reflections                                     | 71661 (5177)                                  | 54772 (3815)                                                                   | 103541 (7514)                                                                 | 56197 (4023)                                                                                                        |
| <i>R</i> <sub>work</sub> / <i>R</i> <sub>free</sub> | 17.3/20.6<br>(25.2/27.3)                      | 23.2/28.5<br>(28.6/38)                                                         | 15.6/18.8<br>(22.5/25.3)                                                      | 16.4/19.6<br>(25.2/29.4)                                                                                            |
| No. atoms                                           |                                               |                                                                                |                                                                               |                                                                                                                     |
| Protein                                             | 7896                                          | 7670                                                                           | 8008                                                                          | 3978                                                                                                                |
| Ligand/ion                                          | 107                                           | 166                                                                            | 124                                                                           | 100                                                                                                                 |
| Water                                               | 357                                           | 212                                                                            | 722                                                                           | 378                                                                                                                 |
| <i>B</i> -factors                                   |                                               |                                                                                |                                                                               |                                                                                                                     |
| Protein                                             | 43.6                                          | 47.4                                                                           | 40.0                                                                          | 30.4                                                                                                                |
| Ligand/ion                                          | 75.2                                          | 50.6                                                                           | 37.2                                                                          | 49.0                                                                                                                |
| Water                                               | 44.3                                          | 42.0                                                                           | 48.3                                                                          | 42.0                                                                                                                |
| R.m.s. deviations                                   |                                               |                                                                                |                                                                               |                                                                                                                     |
| Bond lengths (Å)                                    | 0.011                                         | 0.009                                                                          | 0.011                                                                         | 0.013                                                                                                               |
| Bond angles (°)                                     | 1.403                                         | 1.351                                                                          | 1.513                                                                         | 1.65                                                                                                                |
| Ligands RSCC                                        | –                                             | 2 molecules of <b>12</b><br>(1 per chain, <i>A</i> =<br>0.95, <i>B</i> = 0.95) | 2 molecules of <b>6</b><br>(1 per chain, <i>A</i> =<br>0.98, <i>B</i> = 0.98) | 3 molecules of <b>11</b><br>(8JG <sub>701</sub> = 0.82,<br>8JG <sub>702</sub> = 0.85,<br>8JG <sub>703</sub> = 0.82) |

<sup>a</sup> Data were collected from a single crystal for each structure. Values in parentheses are for highest-resolution shell.

**Supplementary Figure 1.** The unified biosynthetic pathway of PTM and PTN. (a) The *ptm* biosynthetic gene cluster encodes the genes necessary for production of both PTM and PTN. The early steps of PTM biosynthesis are shown with isolated intermediates and the recombinant strains that produced each compound listed<sup>4,7,8</sup>. Carboxylic acid activation with CoA by PtmA1 and PtmA2 occurs before A-ring cleavage and  $\beta$ -oxidation. After platencinyl-CoA is formed, PtmC catalyzes the coupling of ADHBA to form PTM (**1**). The biosynthesis of PTN from *ent*-copalyl diphosphate (CPP) parallels PTM with the exception of the PtmT1-catalyzed formation of *ent*-atiserene, which undergoes similar transformations except for PtmO5, to afford platencinyl-CoA, which is coupled with ADHBA to form PTN (**2**). (b) Selected PTM and PTN intermediates or congeners supporting early activation of the C-19 methyl group.

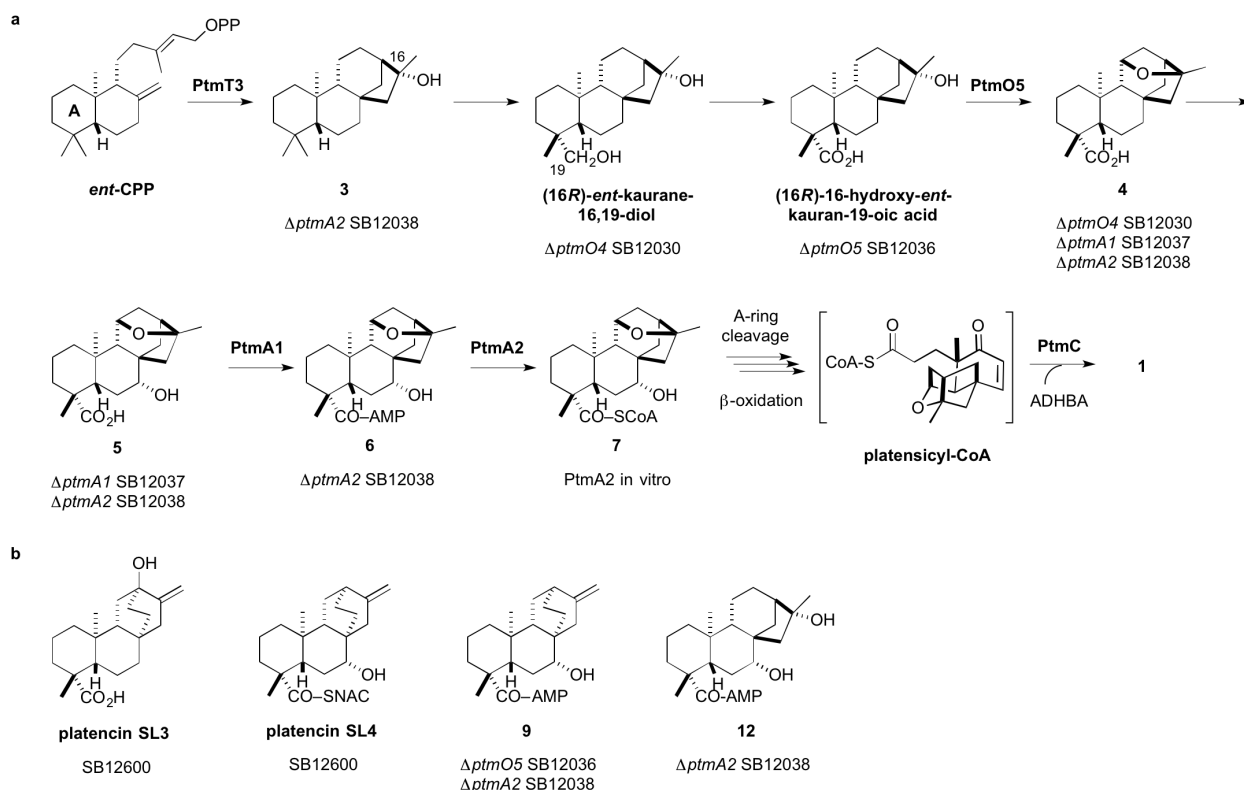



**Supplementary Figure 2.** The *ptm* and *ptn* biosynthetic gene clusters. (a) Genetic organization of the *ptm* gene clusters from the dual PTM–PTN producers *S. platensis* MA7327 and *S. platensis* CB00739 and the *ptn* gene cluster from the PTN-only producer *S. platensis* MA7339<sup>9,10</sup>. The PTM–PTN dual overproducer *S. platensis* SB12029 used in this study to construct the  $\Delta ptmA1$  and  $\Delta ptmA2$  overproducers *S. platensis* SB12037 and SB12038, respectively, was previously constructed by in-frame deletion of the pathway-specific negative regulator *ptmR1* in *S. platensis* CB00739<sup>4</sup>. The three acyl-CoA synthetases discussed in this study, PtmA1, PtmA2, and PtmA3, are encoded by genes in both the *ptm* and *ptn* gene clusters. (b) Phylogenetic tree of PtmA1, PtmA2, PtmA3, and selected members of the ANL superfamily of adenylating enzymes. Bootstrap values >50 (based on 1000 resampled trials) are given at nodes. Bar, 0.5 substitutions per amino acid position. PtmA1, PtmA2, and PtmA3 with selected homologues are shaded in blue, peach, and green boxes, respectively.

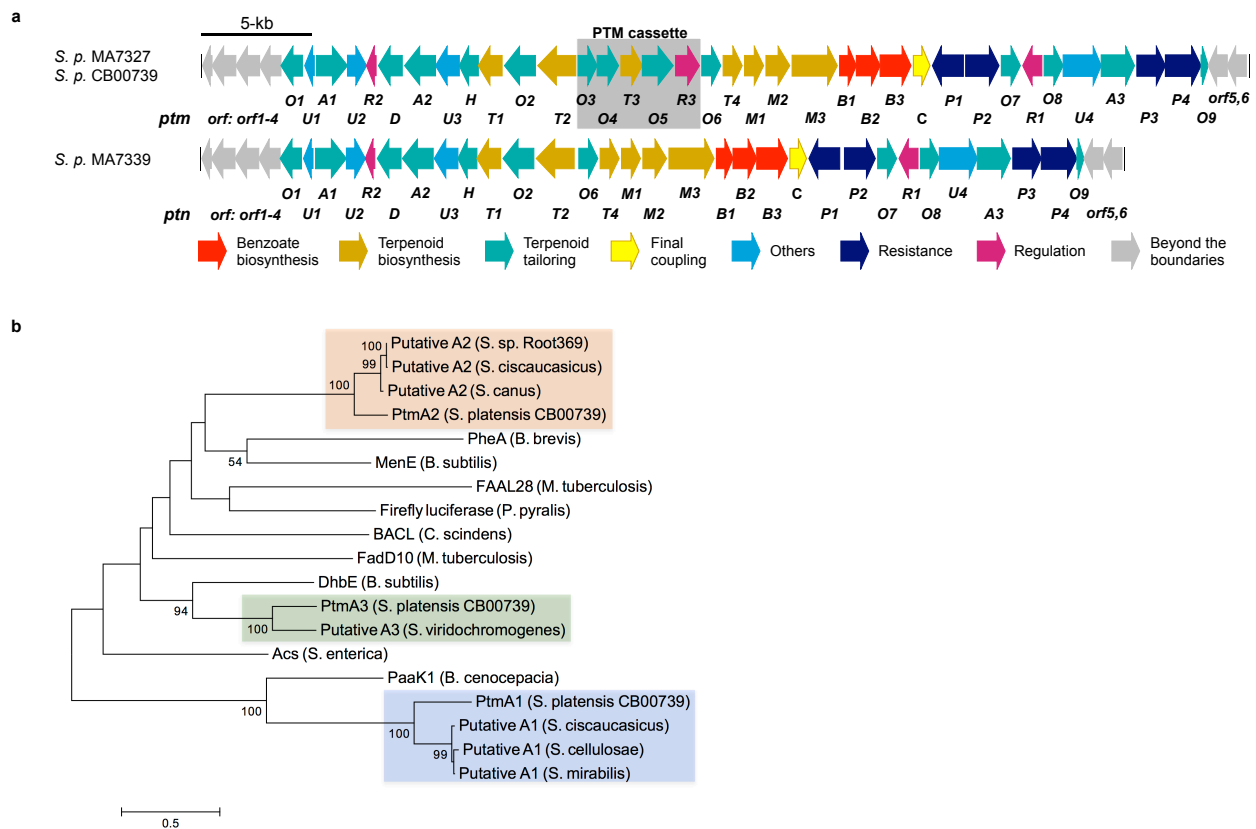

**Supplementary Figure 3.** Design and Southern analysis of the  $\Delta ptmR1/\Delta ptmA1$  double mutant *S. platensis* SB12037. (a) Schematic representation for the deletion of *ptmA1* in *S. platensis* SB12029 by insertion of an *aac(3)IV + oriT* cassette. A probe for *ptmA1* (427 bp), were amplified using genomic DNAs as the template. (b) Southern blot verification of wild-type *ptmA1* (3982 bp) and double crossover  $\Delta ptmA1$  (2123 bp) mutant genotypes. Lane 1, DNA marker VII, DIG-labeled (Roche); lane 2, *S. platensis* SB12029; lane 3, *S. platensis* SB12037. Southern analysis (n=1) was in agreement with PCR diagnostic experiments.

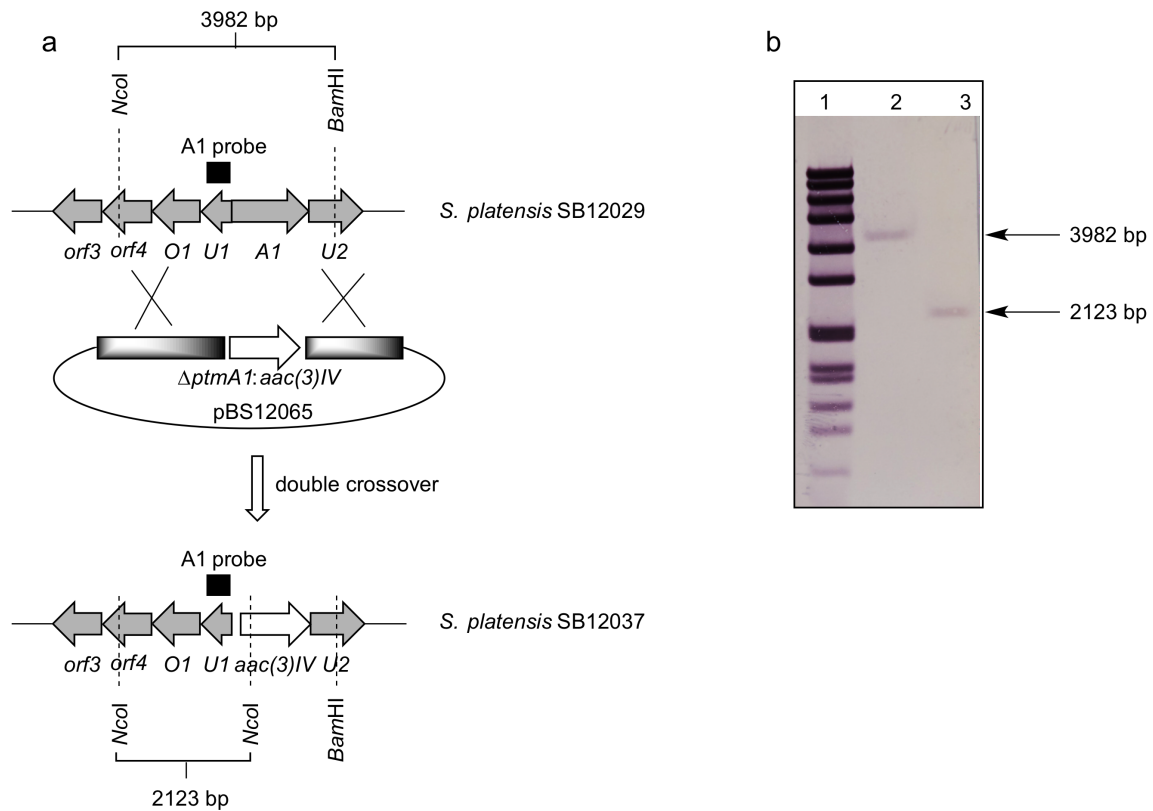

**Supplementary Figure 3 cont.** Design and Southern analysis of the  $\Delta ptmR1/\Delta ptmA2$  double mutant *S. platensis* SB12038. (c) Schematic representation for the deletion of *ptmA2* in *S. platensis* SB12029 by insertion of an *aac(3)IV* + *oriT* cassette. A probe for *ptmA2* (442 bp), were amplified using genomic DNAs as the template. (d) Southern blot verification of wild-type *ptmA2* (4770 bp) and double crossover  $\Delta ptmA2$  (3108 bp) mutant genotypes. Lane 1, *S. platensis* SB12029; lane 2, *S. platensis* SB12038; lane 3, DNA marker VII, DIG-labeled (Roche). Southern analysis (n=1) was in agreement with PCR diagnostic experiments.

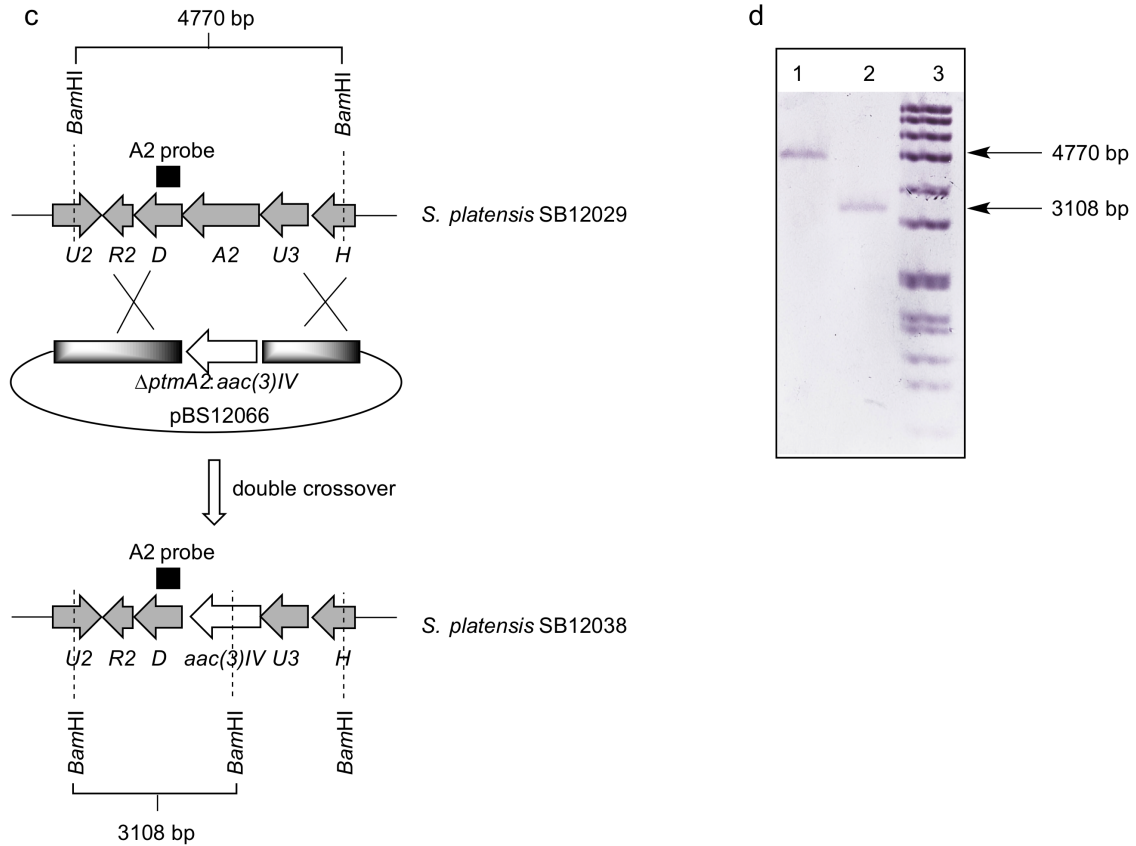

**Supplementary Figure 4.** SDS-PAGE of PtmA2 and mutants. Lanes M, Unstained protein ladder (NEB); lane 1, wild-type PtmA2; lanes 2 and 3, PtmA2 H215A; lanes 4 and 5, PtmA2 E416A; lanes 6 and 7, PtmA2 A497K; lanes 8 and 9, PtmA2 P-loop; lanes 10 and 11, PtmA2 A497K/P-loop. The calculated MWs for wild-type PtmA2 and mutants are all approximately ~59.3 kDa. Gels are representative examples of  $n > 3$  independent experiments.

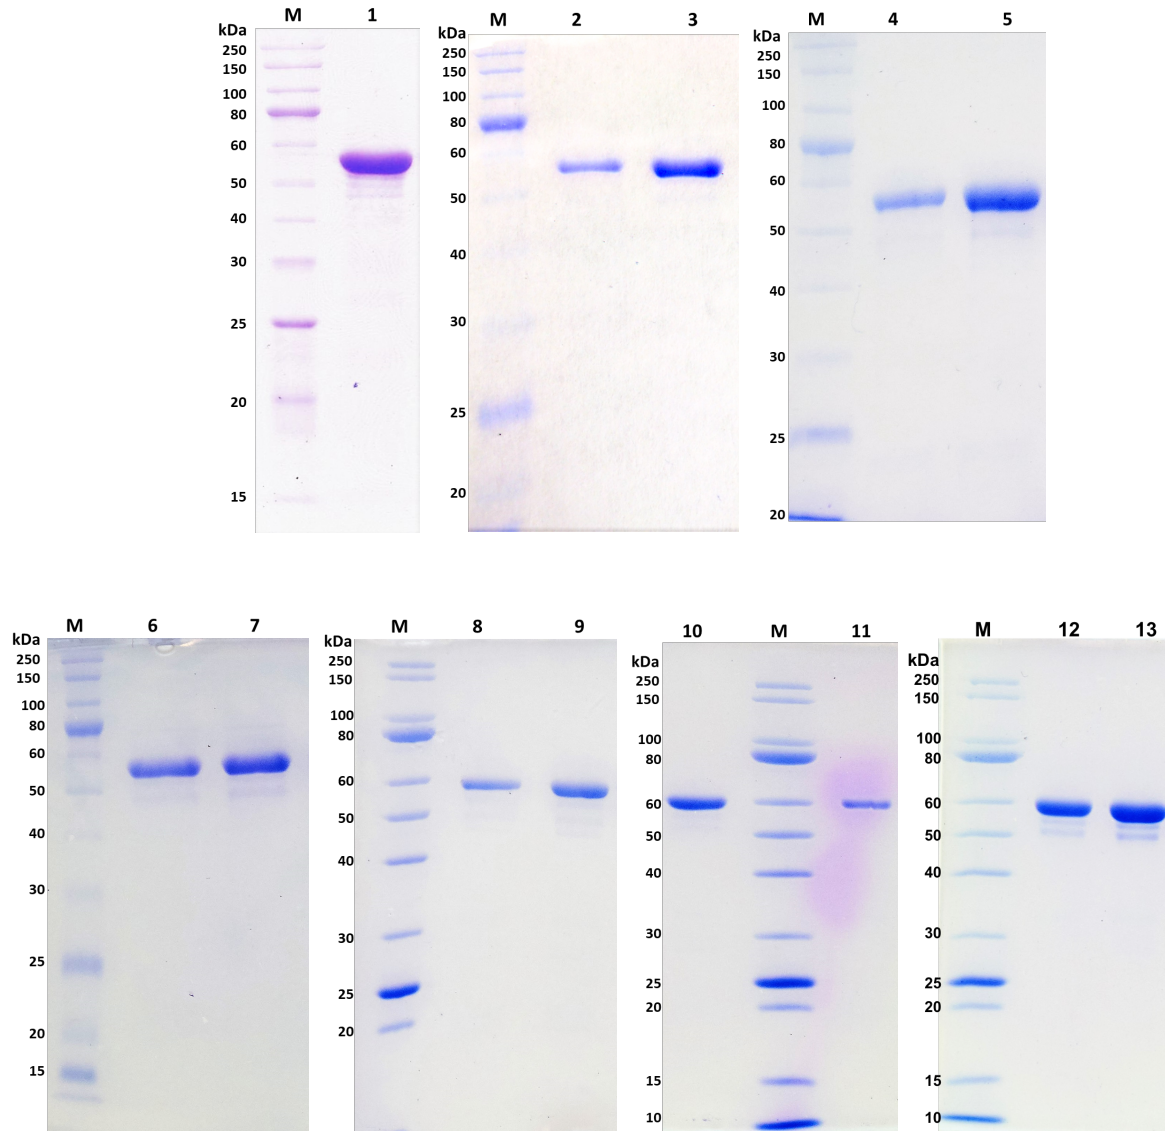

**Supplementary Figure 5.** Total ion chromatograms (TICs) of PtmA2 enzyme reactions. (Panels) Boiled and enzymatic reactions with PtmA2; (stds) overlaid standards of **5**, **6**, and **7** (color-coded). PtmA2 does not catalyze the first half adenylation reaction or the complete (adenylation and thioesterification) reaction. Chromatograms are representative examples of  $n > 3$  independent experiments.

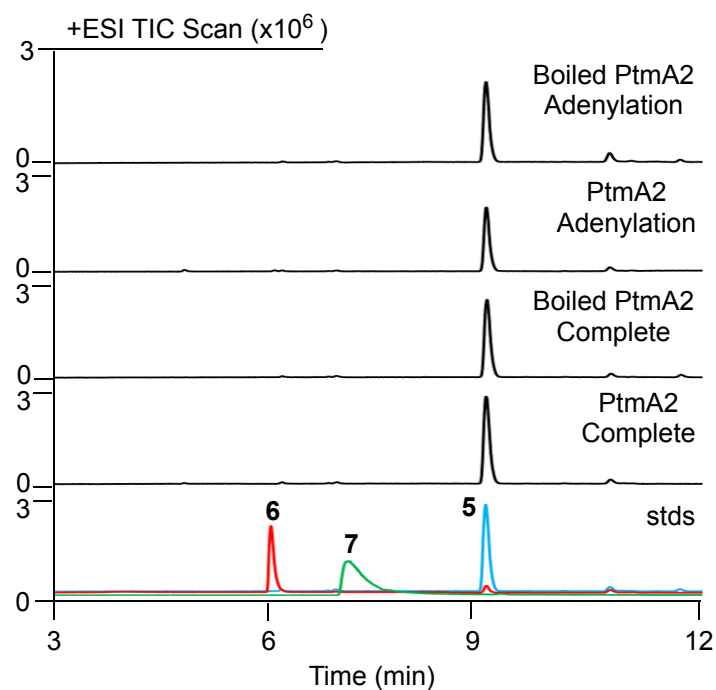

**Supplementary Figure 6.** PtmA2 reaction optimization. All experiments were performed in triplicate and each data point represents the mean of the three independent assays with error bars representing the standard deviation. (a) Buffer and pH optimization. The relative activity of PtmA2 was calculated in the presence of citrate, phosphate, tris or borate buffer (color-coded) with a total pH range of 5.0 – 10.0. (b) Divalent metal ion dependence. The relative activities of the PtmA2 reaction was calculated with (100%) or without (80%) 10 mM EDTA supporting that PtmA2 does not require divalent metal ions for thioesterification.

a

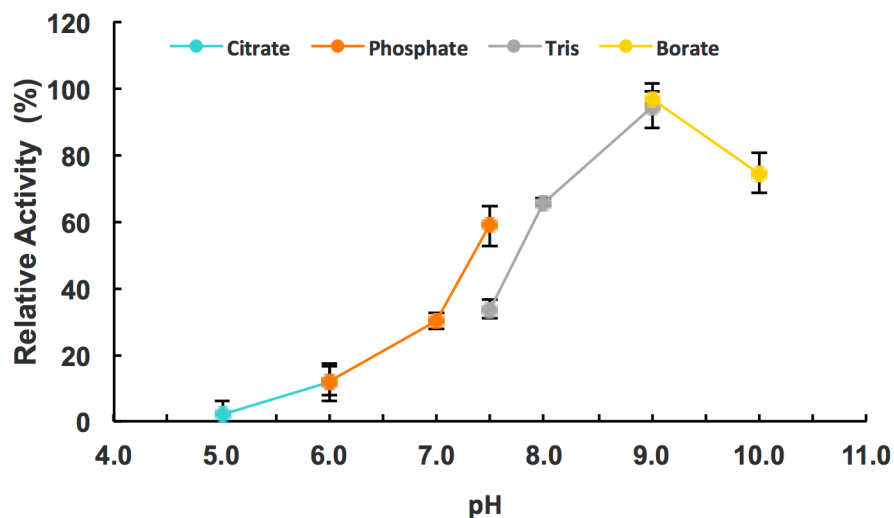

b

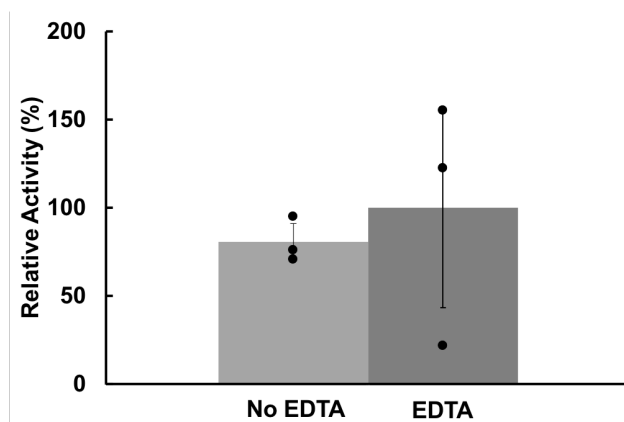

**Supplementary Figure 7.** Steady-state kinetics of PtmA2 and mutants. Michaelis-Menten plots of rate vs substrate, either diterpenoid adenylate or CoA, concentrations are shown. The determined kinetic parameters are summarized in Table 1. Kinetics were performed in triplicate and each data point represents the mean of the three independent assays with error bars representing the standard deviation. Nonlinear regression was performed using the  $K_m$  and  $V_{max}$  Tool Kit ([ic50.tk/kmvmax.html](http://ic50.tk/kmvmax.html)). (a) native PtmA2 (10 nM) and CoA (2 mM) were incubated with varying concentrations (3–200  $\mu\text{M}$ ) of **6**. (b) native PtmA2 (5 nM) and **6** (100  $\mu\text{M}$ ) were incubated with varying concentrations (0.9–125  $\mu\text{M}$ ) of CoA. (c) native PtmA2 (10 nM) and CoA (2 mM) were incubated with varying concentrations (3–100  $\mu\text{M}$ ) of **9**. (d) native PtmA2 (5 nM) and **9** (100  $\mu\text{M}$ ) were incubated with varying concentrations (0.9–125  $\mu\text{M}$ ) of CoA. (e) PtmA2 E416A (500 nM) and CoA (2 mM) were incubated with varying concentrations (0.7–25  $\mu\text{M}$ ) of **6**. (f) PtmA2 E416A (500 nM) and **6** (100  $\mu\text{M}$ ) were incubated with varying concentrations (3.9–125  $\mu\text{M}$ ) of CoA.

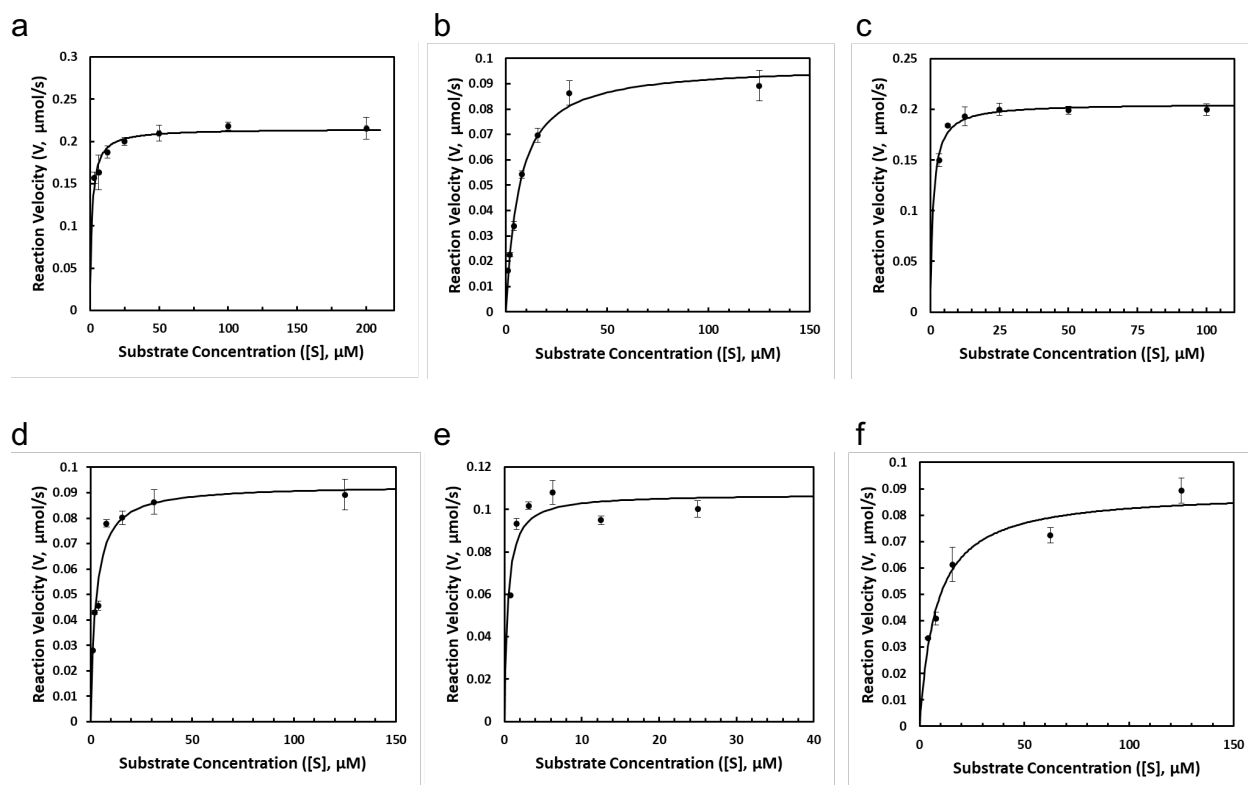

**Supplementary Figure 7 cont.** Steady-state kinetics of PtmA2 mutants (g) PtmA2 A497K (10 nM) and CoA (2 mM) were incubated with varying concentrations (3–200  $\mu\text{M}$ ) of **6**. (h) PtmA2 A497K (2.5 nM) and **6** (100  $\mu\text{M}$ ) were incubated with varying concentrations (0.9–125  $\mu\text{M}$ ) of CoA. (i) PtmA2 P-loop mutant (5 nM) and CoA (2 mM) were incubated with varying concentrations (1–100  $\mu\text{M}$ ) of **6**. (j) PtmA2 P-loop mutant (20 nM) and **6** (100  $\mu\text{M}$ ) were incubated with varying concentrations (15–2000  $\mu\text{M}$ ) of CoA. (k) PtmA2 A497K/P-loop (10 nM) and CoA (2 mM) were incubated with varying concentrations (1–50  $\mu\text{M}$ ) of **6**. (l) PtmA2 A497K/P-loop (10 nM) and **6** (100  $\mu\text{M}$ ) were incubated with varying concentrations (15–2000  $\mu\text{M}$ ) of CoA.

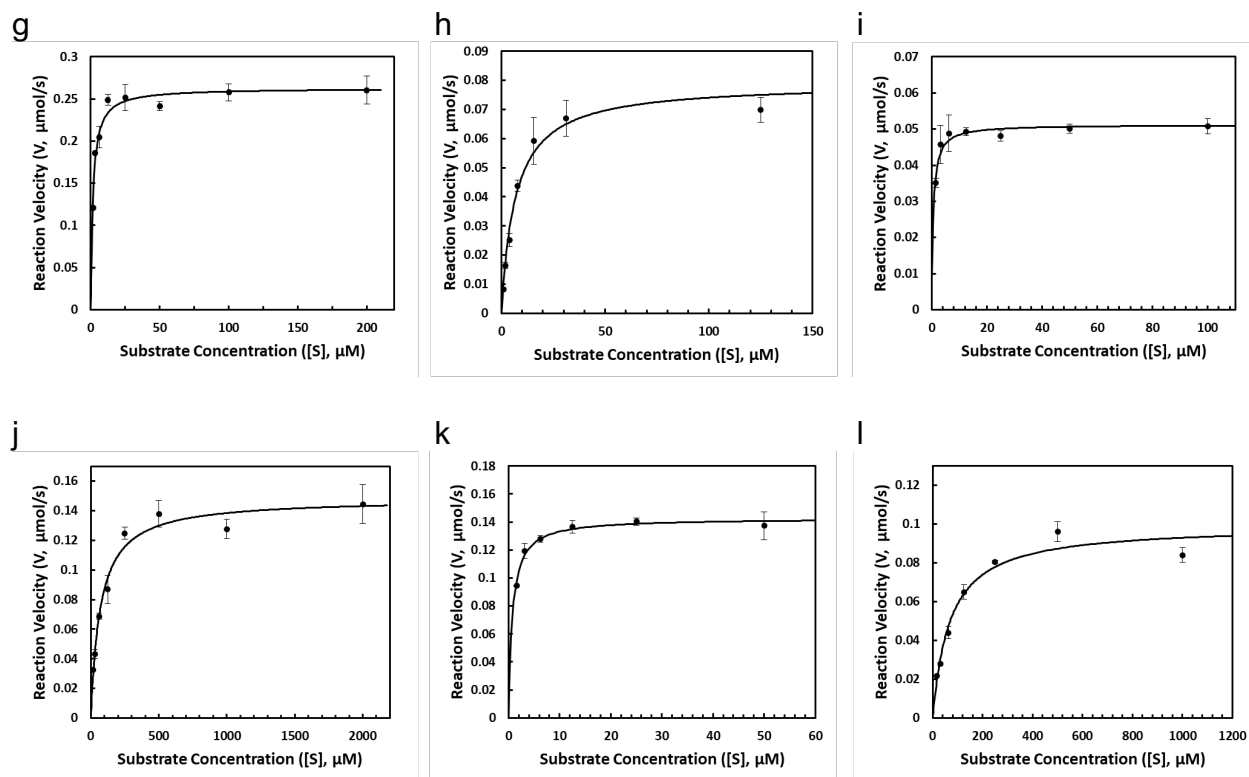



**Supplementary Figure 8.** HPLC chromatograms of PtmA2 enzyme reactions with nonnative adenylate **12**. (Panels) Adenylate **12** incubated with boiled PtmA2 or PtmA2 yielding CoA thioester **14**; (std) Standard of the “open ether” adenylate **12**. Chromatograms are representative examples of  $n > 3$  independent experiments.

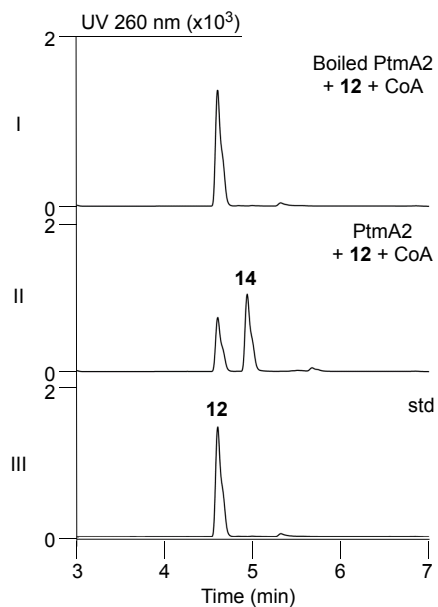

**Supplementary Figure 9.** Electron density maps for selected active site residues and ligands for unliganded and liganded PtmA2. The  $2mF_o - DF_c$  omit maps for (a) active site residues in unliganded PtmA2 (PDB entry 5E7Q), (b) **12** in PtmA2 (5UPQ), (c) **6** in PtmA2 (5UPS), and (d) **11** in PtmA2 (5UPT). A  $1.0\sigma$  contour and a  $2.0 \text{ \AA}$  carve are shown in grey. Occupancies of each ligand are shown as percentages.

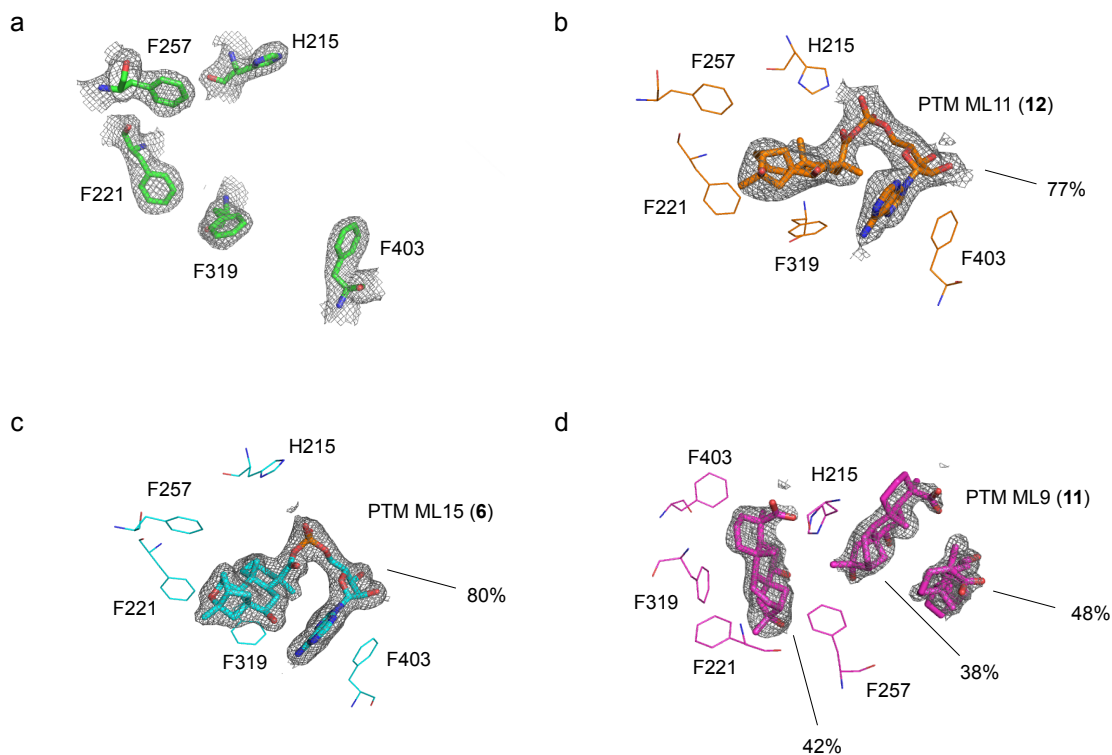

**Supplementary Figure 10.** Full sequence alignment of PtmA2 and selected acyl-CoA synthetases. Aligned residues are colored based on the level of conservation (red box with white character shows strict identity, red character similarity, and blue frame similarity across groups). The corresponding secondary structure of PtmA2 (739A2, PDB entry 5E7Q) is depicted above the sequence alignment. Core motif sequences (A1–A10)<sup>11</sup> and motifs (I–III)<sup>12</sup> are listed in brackets. The alignment was created with MUSCLE<sup>13</sup> and rendered with ESPript 3.0<sup>14</sup>.

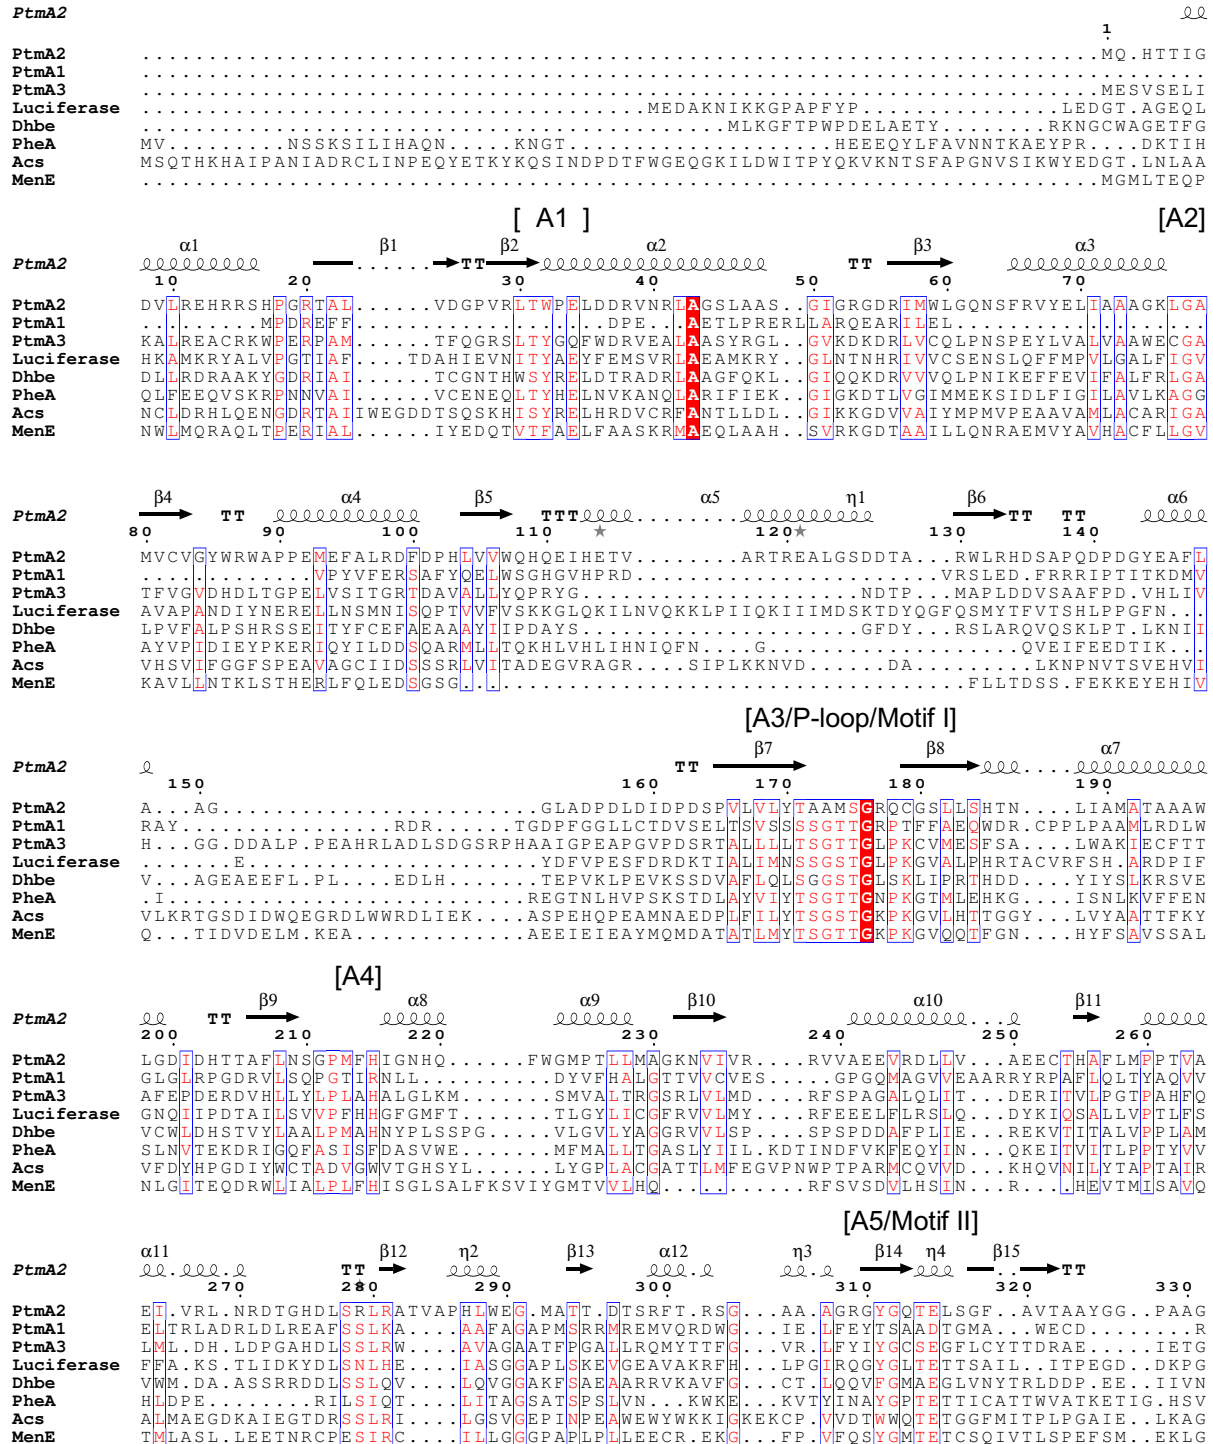

**Supplementary Figure 10 cont.** Full sequence alignment of PtmA2 and selected acyl-CoA synthetases.

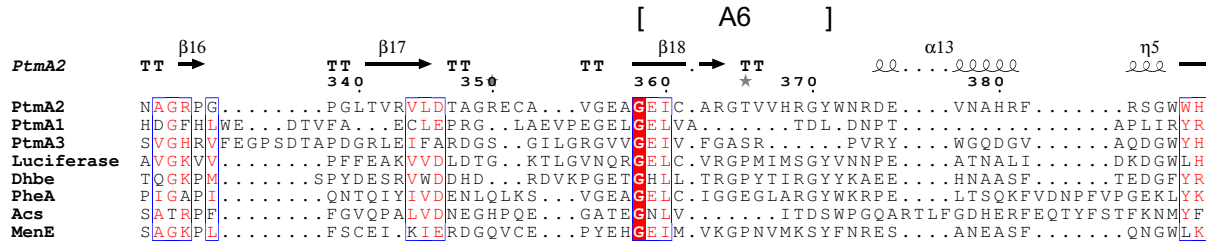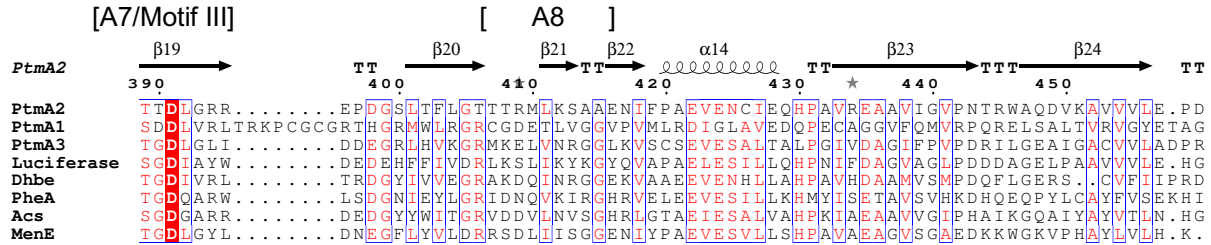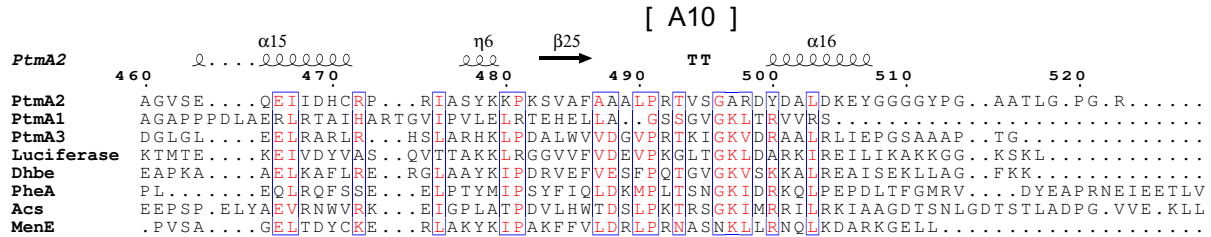

*PtmA2*

*PtmA2*    . . . . .

*PtmA1*    . . . . .

*PtmA3*    . . . . .

*Luciferase*    . . . . .

*Dhbe*    . . . . .

*PheA*    T I W Q D V L G . . . . .

*Acs*    E E K Q A I A M P S . . . . .

*MenE*    . . . . .

**Supplementary Figure 11.** Size-exclusion chromatography of PtmA2. Ribonuclease A (13.7 kDa), ovalbumin (44 kDa), conalbumin (75 kDa), aldolase (158 kDa), and ferritin (440 kDa) were used to construct the standard curve (black circles). The calibration curve of  $K_{av}$  versus  $\log(\text{MW})$  was prepared using the equation  $K_{av} = V_e - V_o / (V_t - V_o)$ , where  $V_e$ ,  $V_o$ , and  $V_t$  is the elution volume, column void volume, and total bed volume, respectively. PtmA2 (red square) eluted at a retention volume of 70.3 mL, correlating to a MW of 112.9 kDa. The calculated MW for His<sub>6</sub>-tagged PtmA2 is ~59.3 kDa. Size-exclusion chromatography was performed n=1 for native PtmA2; the elution volume, and thus calculated MW was consistent with size-exclusion chromatography of selected PtmA2 mutants.

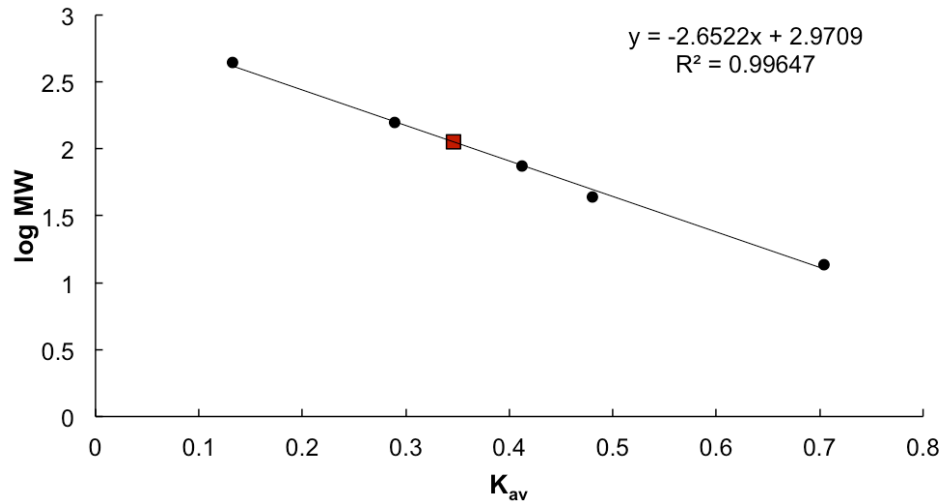

**Supplementary Figure 12.** Domain alternations of PtmA2 and selected members of the ANL superfamily. (a-c) Superposition of the adenylation and thioesterification conformations of PtmA2, *Alcaligenes* sp. 4-chlorobenzoyl-CoA ligase (CBL)<sup>15</sup>, and human medium chain acyl-CoA synthetase (hACS)<sup>16</sup>, respectively. The N and C-terminal domains, which are shown in dark and light colors, respectively, rotate 158°, 143°, 133°, respectively. (d) Superposition of the adenylation conformations of PtmA2 and CBL. (e) Superposition of the thioesterification conformations of PtmA2 and hACS. (f) Superposition of the thioesterification conformations of PtmA2 and CBL. (g) Superposition of the thioesterification conformations of PtmA2 and hACS.

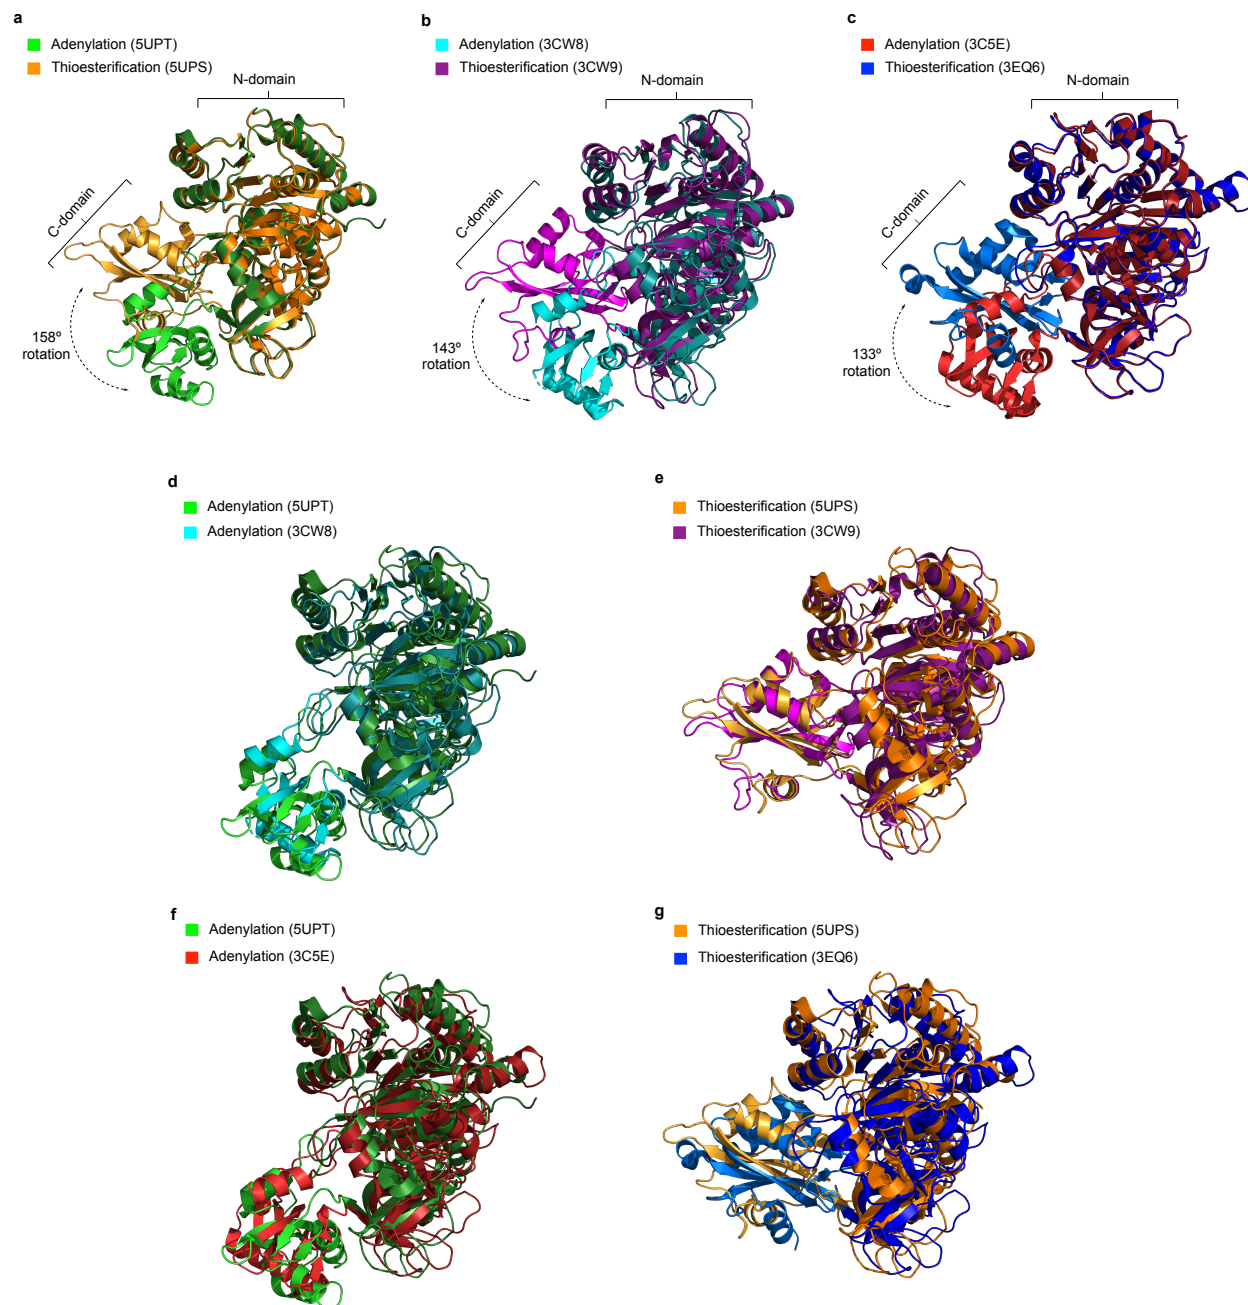

**Supplementary Figure 13.** HPLC chromatograms of PtmA2 mutant thioesterification reactions. (Panels) Adenylate **6** incubated with boiled PtmA2 variants or PtmA2 variants; (stds) overlaid standards of **6** and **7** (color-coded). Chromatograms are representative examples of n>3 independent experiments.

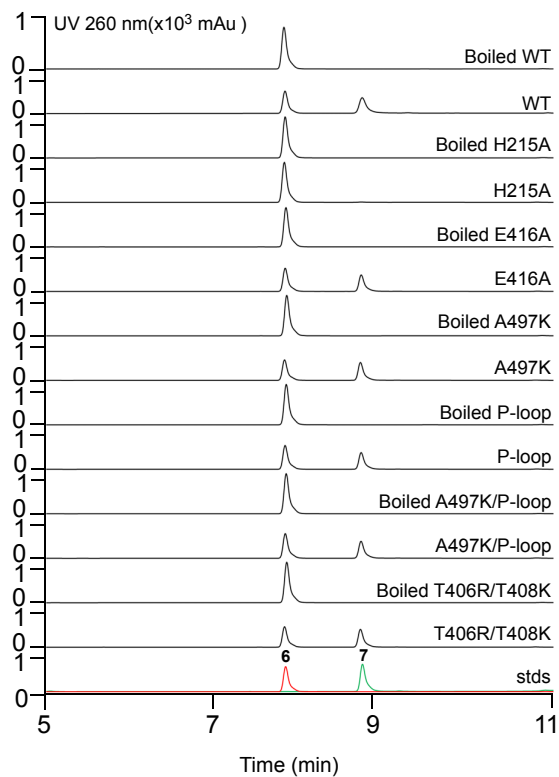

**Supplementary Figure 14.** LC-MS chromatograms of PtmA2 mutant reactions. (a) Total ion chromatograms (TICs) and (b) extracted ion chromatograms (EICs) of PtmA2 mutant enzyme reactions. (Panels) Adenylation and complete (both adenylation and thioesterification) reactions with native and mutant PtmA2; (stds) overlaid standards of 5, 6, and 7 (color-coded). See Supplementary Figs. 15 and 17 for reactions using free acid **8** and negative controls using boiled PtmA2, respectively. Chromatograms are representative examples of  $n > 3$  independent experiments.

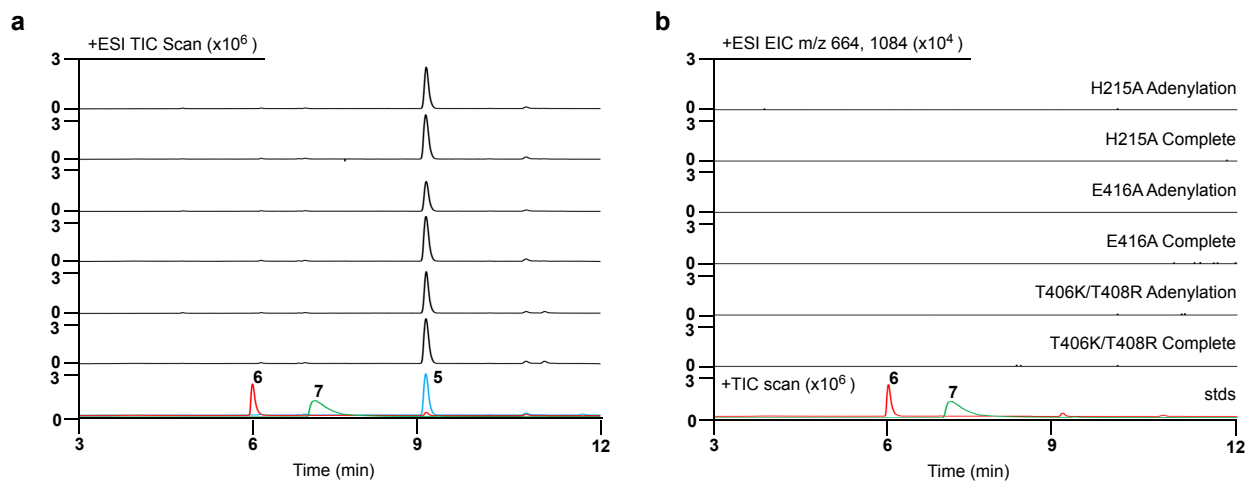



**Supplementary Figure 15.** Conversion of free acid **8** to CoA thioester **10** using PtmA2 mutants. (a) Total ion chromatograms (TICs) and (b) extracted ion chromatograms (EICs) of each PtmA2 mutant enzyme reaction. (Panels) Adenylation and complete reactions, along with boiled enzyme negative controls, with native and mutant PtmA2; (stds) overlaid standards of **8**, **9**, and **10** (color-coded). Adenylation reactions were incubated with free acid **8**, ATP, and  $Mg^{2+}$ ; complete reactions were incubated with free acid **8**, ATP,  $Mg^{2+}$ , and CoA. Chromatograms are representative examples of  $n > 3$  independent experiments.

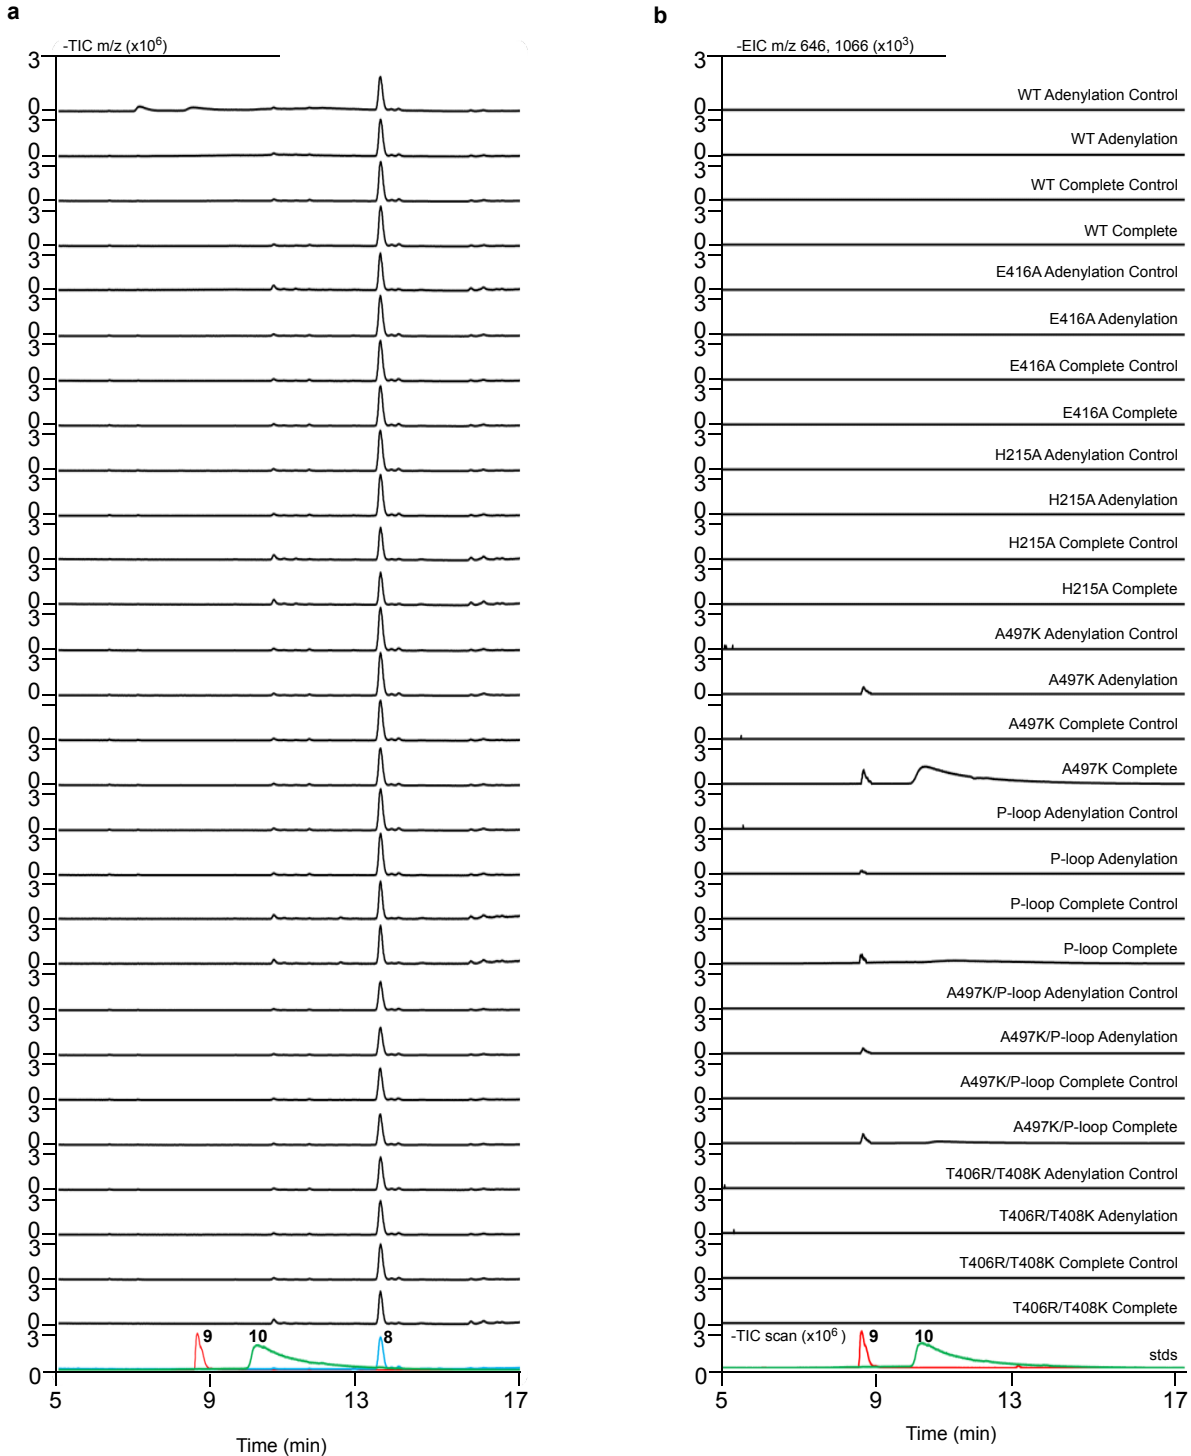

**Supplementary Figure 16.** Sequence alignment of PtmA2 and selected PtmA2-like acyl-CoA ligases. A3 (P-loop), A4, A8, and A10 core motifs are shown. All selected homologues are from gram-positive bacteria with protein sequence identities ranging from 67–97%.

|                |     | <b>A3 (P-loop)</b> |     | <b>A4</b> |         | <b>A8</b> |     | <b>A10</b> |     |     |         |
|----------------|-----|--------------------|-----|-----------|---------|-----------|-----|------------|-----|-----|---------|
| PtmA2          | 168 | VLYTAAMSGRQCG      | ... | 212       | PMFHIGN | ...       | 406 | TTRMLKSAAE | ... | 491 | PRTVSGA |
| PtnA2          | 168 | VLYTAAMSGRQCG      | ... | 212       | PMFHIGN | ...       | 406 | TTRMLKSAAE | ... | 491 | PRTVSGA |
| WP_053210057.1 | 168 | VLYTAAMSGRQCG      | ... | 212       | PMFHIGN | ...       | 406 | TTRMLKSAAE | ... | 491 | PRTVSGA |
| WP_030985283.1 | 168 | VLYTAAMSGRQCG      | ... | 212       | PMFHIGN | ...       | 406 | TTRMLKSAAE | ... | 491 | PRTVSGA |
| WP_033318305.1 | 175 | VIYTAAITGRQSG      | ... | 219       | PMFHIGN | ...       | 413 | TTRMLKSAAE | ... | 498 | PRTGGYA |
| WP_055612017.1 | 174 | VIYTAAITGRQSG      | ... | 218       | PMFHIGN | ...       | 412 | TTRMLKSAAE | ... | 498 | PRTKDYA |
| WP_030660837.1 | 169 | VIYTAAISGRQSG      | ... | 213       | PMFHIGN | ...       | 407 | TTRMLKSAAE | ... | 493 | PRTKDFY |
| WP_030927792.1 | 169 | VIYTAAISGRQSG      | ... | 213       | PMFHIGN | ...       | 407 | TTRMLKSAAE | ... | 493 | PRTKDYA |
| WP_043677510.1 | 169 | VIYTAAISGRQSG      | ... | 213       | PMFHIGN | ...       | 407 | TTRMLKSAAE | ... | 493 | PRTKDFY |
| WP_020120457.1 | 184 | VIYTAAISGRQSG      | ... | 228       | PMFHIGN | ...       | 422 | TTRMLKSAAE | ... | 508 | PRTKDYA |
| EDY54705.1     | 163 | VIYTAAISGRQSG      | ... | 207       | PMFHIGN | ...       | 401 | TTRMLKSAAE | ... | 487 | PRTKDYA |
| WP_037902523.1 | 169 | VIYTAAISGRQSG      | ... | 213       | PMFHIGN | ...       | 407 | TTRMLKSAAE | ... | 493 | PRTKDYA |
| WP_057582384.1 | 169 | VIYTAAISGRQSG      | ... | 213       | PMFHIGN | ...       | 407 | TTRMLKSAAE | ... | 493 | PRTKDYA |
| WP_037709893.1 | 169 | VIYTAAISGRQSG      | ... | 213       | PMFHIGN | ...       | 407 | TTRMLKSAAE | ... | 493 | PRTKDYA |
| WP_031055094.1 | 169 | VIYTAAISGRQSG      | ... | 213       | PMFHIGN | ...       | 407 | TTRMLKSAAE | ... | 493 | PRTKDYA |
| WP_062039429.1 | 174 | VIYTAAISGRQSG      | ... | 218       | PMFHIGN | ...       | 412 | TTRMLKSAAE | ... | 498 | PRTKDYA |
| WP_057612788.1 | 169 | VIYTAAISGRQSG      | ... | 213       | PMFHIGN | ...       | 407 | TTRMLKSAAE | ... | 493 | PRTKDYA |
| WP_059203844.1 | 169 | VIYTAAISGRQSG      | ... | 213       | PMFHIGN | ...       | 407 | TTRMLKSAAE | ... | 493 | PRTKDYA |
| WP_033278459.1 | 169 | VIYTAAISGRQSG      | ... | 213       | PMFHIGN | ...       | 407 | TTRMLKSAAE | ... | 493 | PRTKDFG |
| WP_020639301.1 | 173 | VIYTAAMSGTQCG      | ... | 217       | PMFHIGN | ...       | 411 | TTRMLKSAAE | ... | 496 | PRTAAFY |
| WP_013225717.1 | 174 | VIYTAAMSGQCG       | ... | 218       | PMFHIGN | ...       | 412 | TTRMLKSAAE | ... | 498 | PRTAQFY |

**Supplementary Figure 17.** LC-MS chromatograms of boiled PtmA2 mutant enzyme reactions. See Fig. 5b, 5c and Supplementary Fig. 14 for reaction comparisons. (a) Total ion chromatograms (TICs) and (b) extracted ion chromatograms (EICs) of each reaction. Chromatograms are representative examples of  $n > 3$  independent experiments.

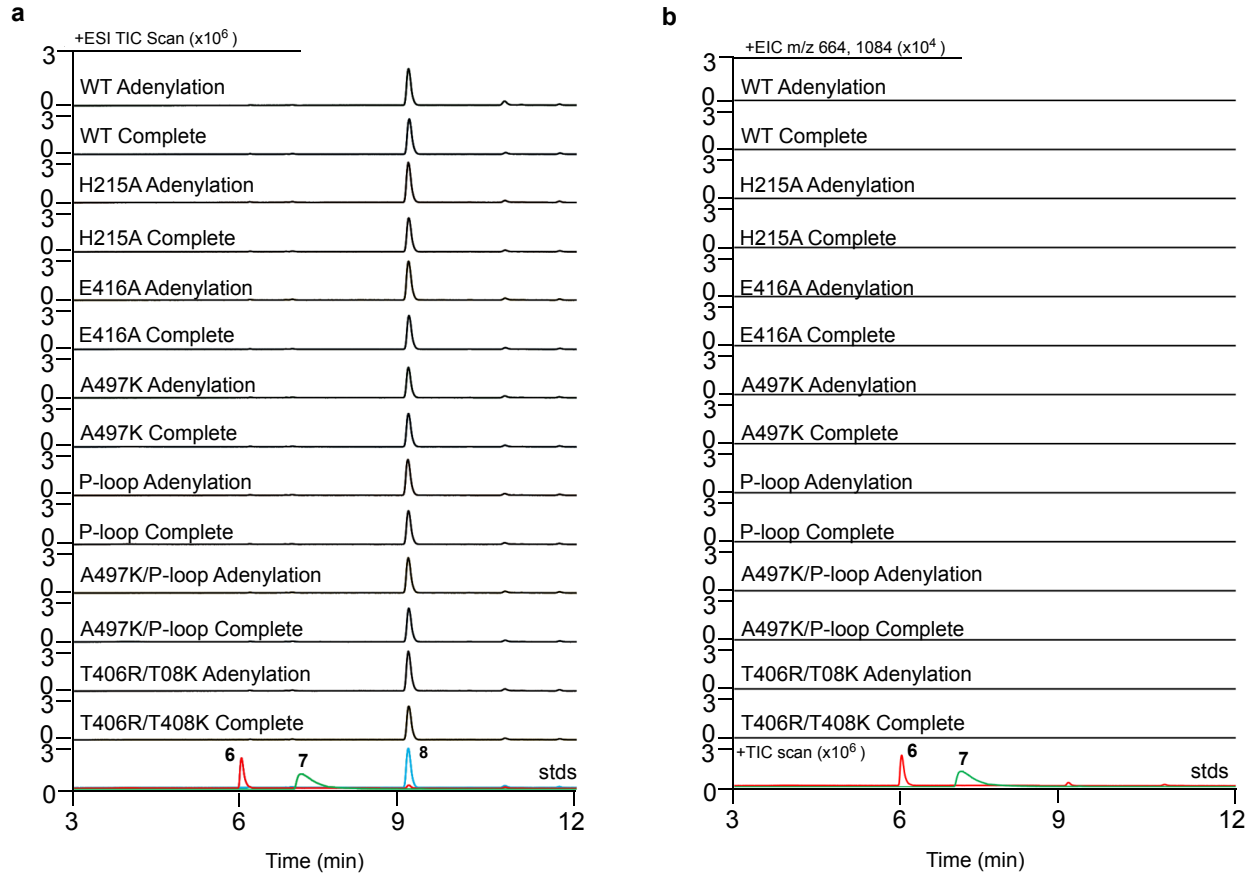

## Supplementary Information References

1. Gust, B., Challis, G.L., Fowler, K., Kieser, T. & Chater, K.F. PCR-targeted *Streptomyces* gene replacement identifies a protein domain needed for biosynthesis of the sesquiterpene soil odor geosmin. *Proc. Natl. Acad. Sci. U. S. A.* **100**, 1541–1546 (2003).
2. Cherepanov, P.P. & Wackernagel, W. Gene disruption in *Escherichia coli*: TcR and KmR cassettes with the option of FLP-catalyzed excision of the antibiotic-resistance determinant. *Gene* **158**, 9–14 (1995).
3. MacNeil, D.J. et al. Analysis of *Streptomyces avermitilis* genes required for avermectin biosynthesis utilizing a novel integration vector. *Gene* **111**, 61–68 (1992).
4. Rudolf, J.D., Dong, L.-B., Huang, T. & Shen, B. A genetically amenable platensimycin- and platencin-overproducer as a platform for biosynthetic explorations: a showcase of PtmO4, a long-chain acyl-CoA dehydrogenase. *Mol. BioSyst.* **11**, 2717–2726 (2015).
5. Lohman, J.R., Bingman, C.A., Phillips, G.N. & Shen, B. Structure of the bifunctional acyltransferase/decarboxylase LnmK from the leinamycin biosynthetic pathway revealing novel activity for a double-hot-dog fold. *Biochemistry* **52**, 902–911 (2013).
6. Eschenfeldt William, H. et al. New LIC vectors for production of proteins from genes containing rare codons. *J. Struct. Funct. Genomics* **14**, 135–144 (2013).
7. Rudolf, J.D., Dong, L.-B., Manoogian, K. & Shen, B. Biosynthetic origin of the ether ring in platensimycin. *J. Am. Chem. Soc.* **138**, 16711–16721 (2016).
8. Smanski, M.J. et al. Expression of the platencin biosynthetic gene cluster in heterologous hosts yielding new platencin congeners. *J. Nat. Prod.* **75**, 2158–2167 (2012).
9. Smanski, M.J. et al. Dedicated *ent*-kaurene and *ent*-atiserene synthases for platensimycin and platencin biosynthesis. *Proc. Natl. Acad. Sci. U. S. A.* **108**, 13498–13503 (2011).
10. Hindra et al. Strain prioritization for natural product discovery by a high-throughput real-time PCR method. *J. Nat. Prod.* **77**, 2296–2303 (2014).
11. Marahiel, M.A., Stachelhaus, T. & Mootz, H.D. Modular peptide synthetases involved in nonribosomal peptide synthesis. *Chem. Rev.* **97**, 2651–2673 (1997).
12. Chang, K.-H., Xiang, H. & Dunaway-Mariano, D. Acyl-adenylate motif of the acyl-adenylate/thioester-forming enzyme superfamily: a site-directed mutagenesis study with the *Pseudomonas* sp. strain CBS3 4-chlorobenzoate:coenzyme A ligase. *Biochemistry* **36**, 15650–15659 (1997).
13. Edgar, R.C. MUSCLE: multiple sequence alignment with high accuracy and high throughput. *Nucleic Acids Res.* **32**, 1792–1797 (2004).
14. Gouet, P., Courcelle, E., Stuart, D.I. & Metz, F. ESPript: analysis of multiple sequence alignments in PostScript. *Bioinformatics* **15**, 305–308 (1999).
15. Reger, A.S., Wu, R., Dunaway-Mariano, D., & Gulick, A.M. Structural characterization of a 140 degree domain movement in the two-step reaction catalyzed by 4-chlorobenzoate:CoA ligase. *Biochemistry* **47**, 8016–8025 (2008).
16. Kochan, G., Pilka, E.S., von Delft, F., Opperman, U. & Yue, W.W. Structural snapshots for the conformation-dependent catalysis by human medium-chain acyl-coenzyme A synthetase ACSM2A. *J. Mol. Biol.* **388**, 997–1008 (2009).
